# Supplementary material for: GIS-Facilitated Germination of Stored Seeds from Five Wild-Growing Populations of Campanula pelviformis Lam. and Fertilization Effects on Growth, Nutrients, Phenol Content and Antioxidant Potential
Source: Preprints.org preprint supplement (doi:10.20944/preprints202307.0555.v1), 2023-07-10
Supplement: Supplementary file 1 [file supplementary]

**Table S1.** Ecological profile across the natural distribution range of *Campanula pelviformis* wild-growing populations in Crete linked in GIS with geodatabases (WorldClim version 2.1), providing values for: **(A)** minimum temperatures per month (°C), **(B)** maximum temperatures per month (°C), **(C)** average temperatures per month (°C), **(D)** precipitation per month (mm), and **(E)** calculated values for 19 bioclimatic variables. For **(A–E)** minimum, maximum, average, and standard deviation is shown based on data from 1970–2000. The colors of the plotted lines illustrate the minimum (blue), maximum (orange), and mean (grey) monthly values for temperature (°C) and precipitation (mm).
